# Supplementary figures and images for: Protein domain embeddings for fast and accurate similarity search
Source: HighWire-hosted journal article supplement (doi:10.1101/gr.279127.124), 2024-09-01

AUC1 Scores for CATH20 Queries

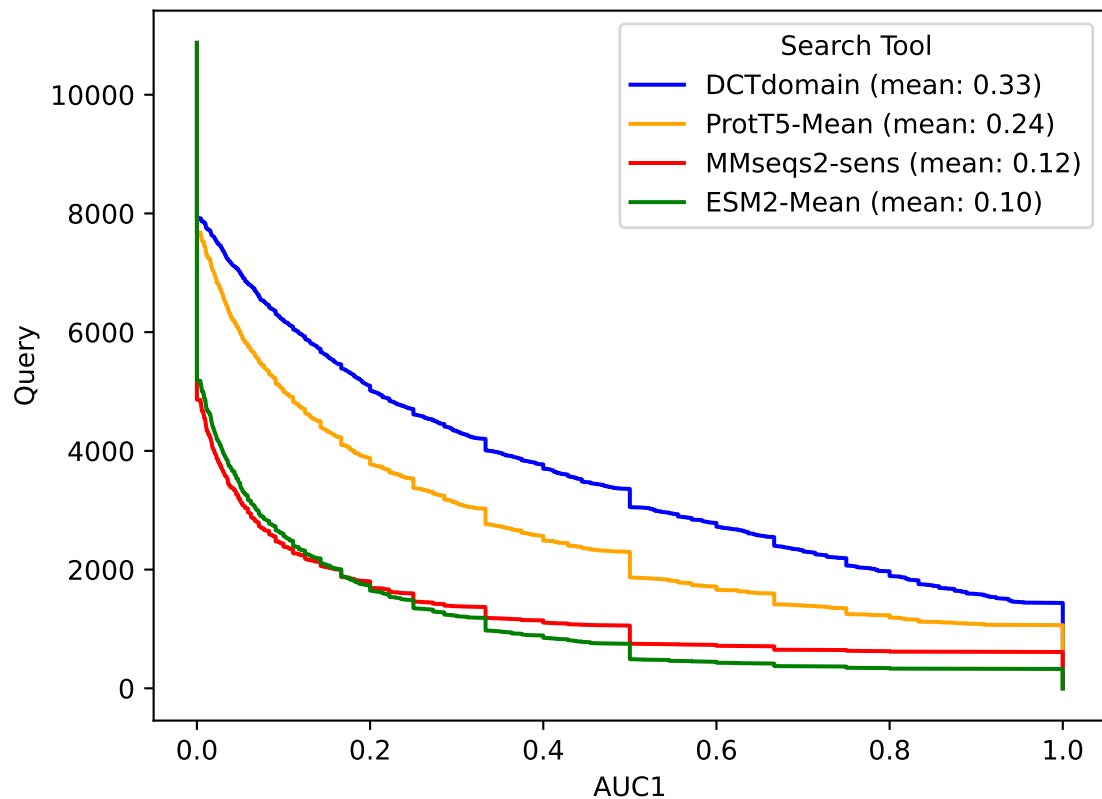

Supplement: Supplemental_Code.tar.gz [file cath_auc1.pdf › DCTdomain/bench/cathdb/cath_auc1.pdf]

gene3d\_nomax50

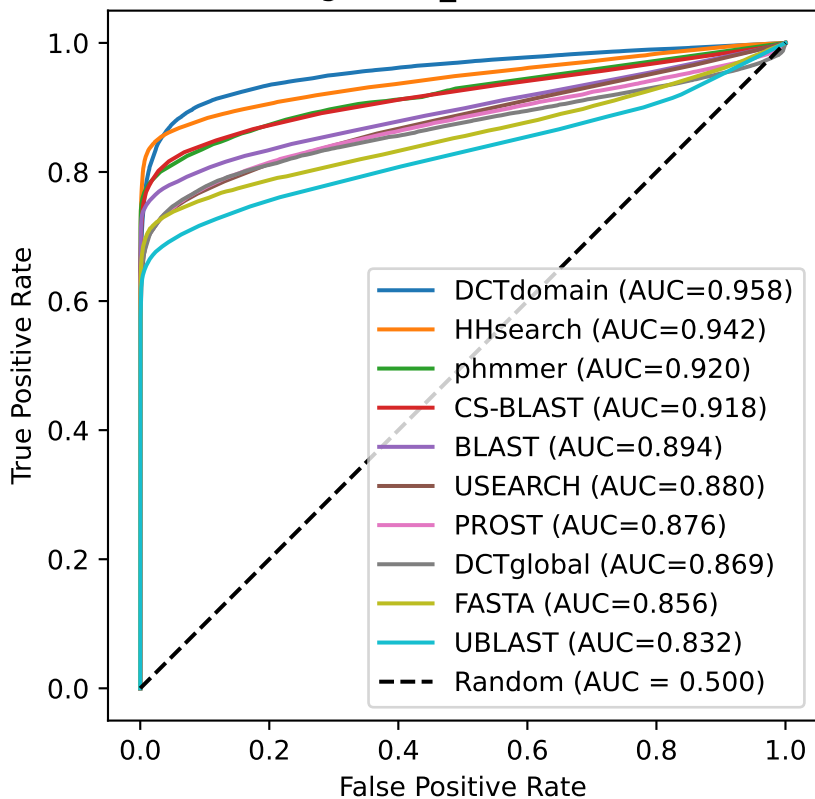

Supplement: Supplemental_Code.tar.gz [file gene3d_nomax50-roc.pdf › DCTdomain/bench/homo/results/gene3d_nomax50-roc.pdf]

local

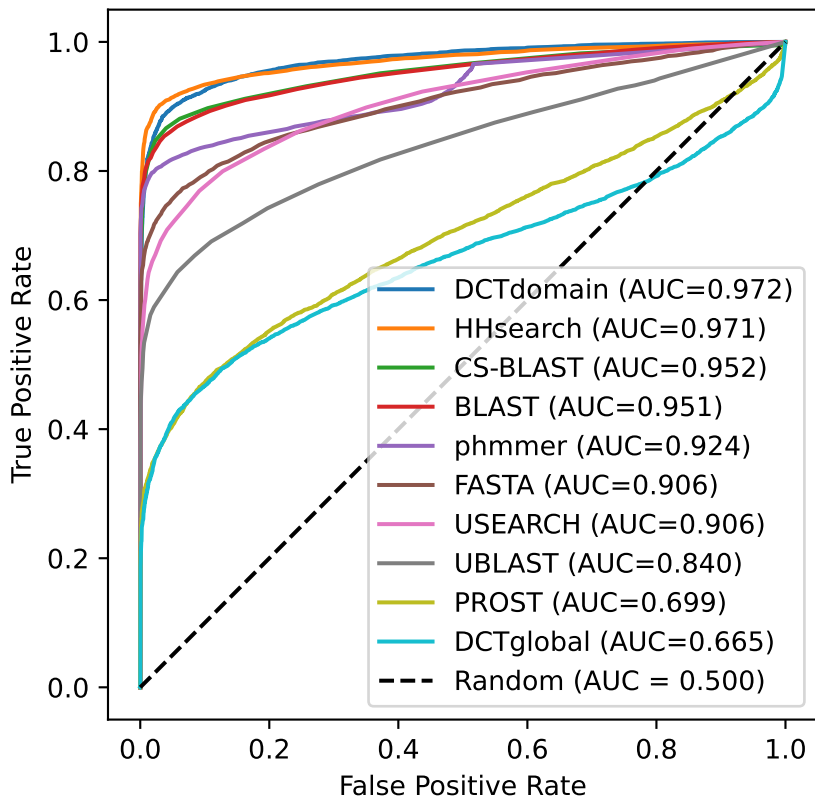

Supplement: Supplemental_Code.tar.gz [file local-roc.pdf › DCTdomain/bench/homo/results/local-roc.pdf]

max50

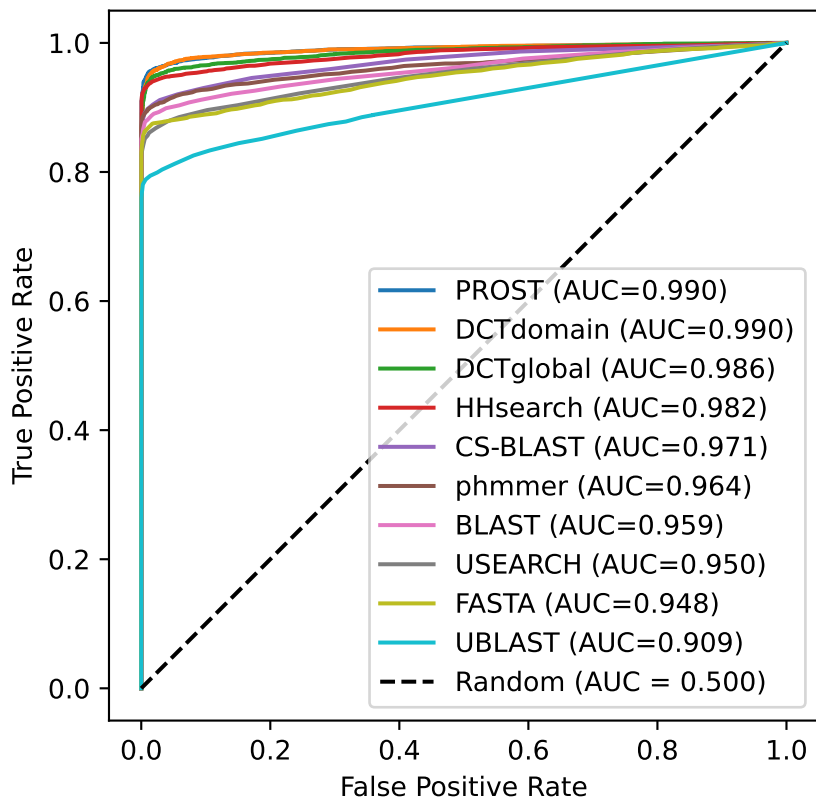

Supplement: Supplemental_Code.tar.gz [file max50-roc.pdf › DCTdomain/bench/homo/results/max50-roc.pdf]

nomax50

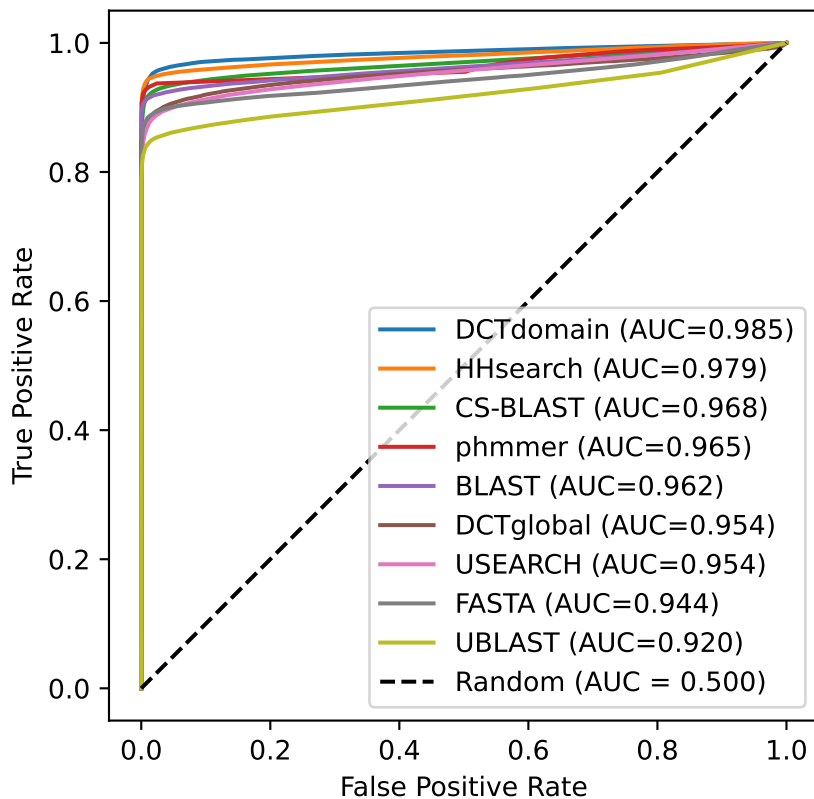

Supplement: Supplemental_Code.tar.gz [file nomax50-roc.pdf › DCTdomain/bench/homo/results/nomax50-roc.pdf]

pfam\_nomax50

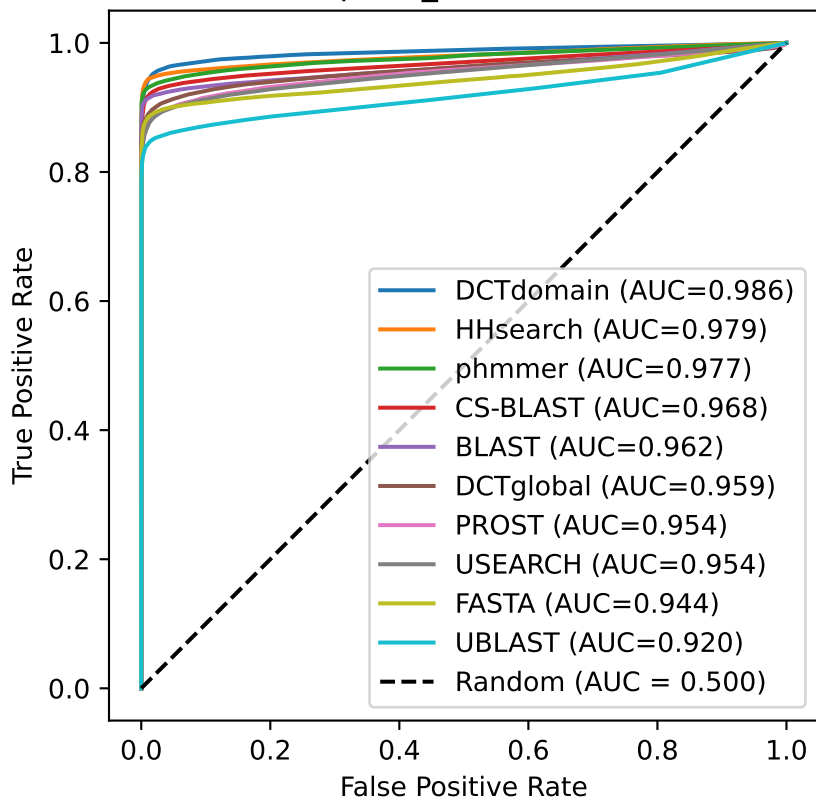

Supplement: Supplemental_Code.tar.gz [file pfam_nomax50-roc.pdf › DCTdomain/bench/homo/results/pfam_nomax50-roc.pdf]

supfam\_nomax50

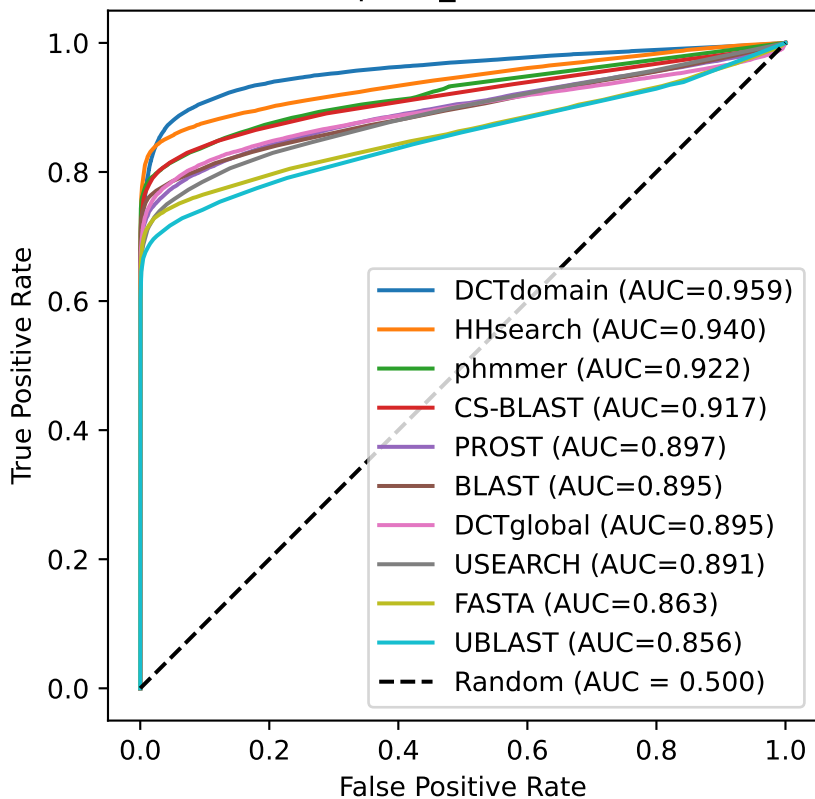

Supplement: Supplemental_Code.tar.gz [file supfam_nomax50-roc.pdf › DCTdomain/bench/homo/results/supfam_nomax50-roc.pdf]
